# Supplementary material
Source: Springer Nature journal article supplement (https://www.springermedizin.de/resource/supplementary/12939_2012_371_MOESM4_ESM.pdf/9551004)
Supplement: MOESM4 [file 9551004]

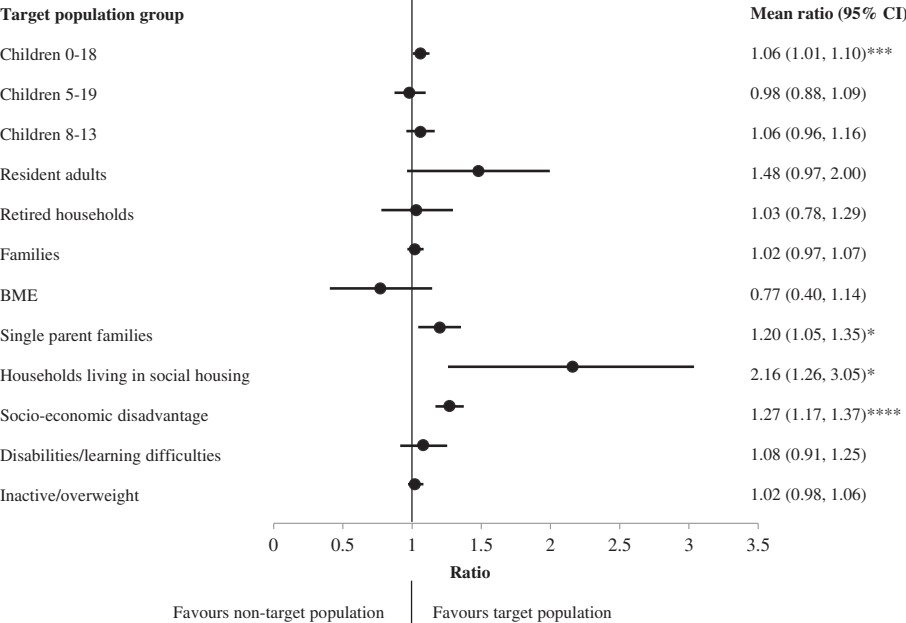

Notes: \*  $p < 0.1$ , \*\*  $p < 0.05$ , \*\*\*  $p < 0.01$ , \*\*\*\*  $p < 0.001$ ;  $p$  values from Student's t-tests comparing mean ratio with a ratio of 1.

BME: Black and minority ethnic
